# Supplementary material for: Effect of Dietary L-Threonine and Toxin Binder on Performance, Blood Parameters, and Immune Response of Broilers Exposed to Aflatoxin B1
Source: MDPI journal article supplement (doi:10.3390/toxins14030192), 2022-03-04
Supplement: s1 [file s1]

# Effect of Dietary L-Threonine and Toxin Binder on Performance, Blood Parameters, and Immune Response of Broilers Exposed to Aflatoxin B<sub>1</sub>

Aydin Mesgar, Habib Aghdam Shahryar, Christopher Anthony Bailey, Yahya Ebrahimnezhad and Anand Mohan

**Table S1.** Interaction effect between L-Threonine and Mycofix Plus (MP); on breast meat yield and LDL<sup>1</sup> of broilers, Cobb 500<sup>2</sup>.

| Independent Variables          |          | Breast                                 | LDL                 |
|--------------------------------|----------|----------------------------------------|---------------------|
| L-Threonine, % of Requirements | MP, g/kg | Relative Weight, % of Live Body Weight | mg/dl               |
| 100                            | 0        | 21.32 <sup>ab</sup>                    | 24.37 <sup>b</sup>  |
| 100                            | 1        | 20.06 <sup>b</sup>                     | 33.88 <sup>ab</sup> |
| 125                            | 0        | 21.28 <sup>ab</sup>                    | 36.22 <sup>a</sup>  |
| 125                            | 1        | 21.89 <sup>a</sup>                     | 29.59 <sup>ab</sup> |
| <i>P</i> -value                |          | *                                      | *                   |

<sup>a,b</sup>Means within a column with differing superscripts are significantly different at \**P* < 0.05. <sup>1</sup>Low-Density Lipoprotein. <sup>2</sup>Means represent 16 pens of chickens with 10 birds per pen (*n* = 16/group).

**Table S2.** Interaction effect between Mycofix Plus (MP) and Aflatoxin B<sub>1</sub>, on Cholesterol, HDL<sup>1</sup>, ALT<sup>2</sup>, and LDH<sup>3</sup> of broilers, Cobb 500<sup>4</sup>.

| Independent Variables |                                    | Cholesterol          | HDL                 | ALT                | LDH                  |
|-----------------------|------------------------------------|----------------------|---------------------|--------------------|----------------------|
| MP, g/kg              | Aflatoxin B <sub>1</sub> , 500 ppb | mg/dl                | mg/dl               | u/l                | u/l                  |
| 0                     | -                                  | 131.91 <sup>ab</sup> | 80.31 <sup>a</sup>  | 3.88 <sup>b</sup>  | 811.00 <sup>ab</sup> |
| 0                     | +                                  | 122.92 <sup>b</sup>  | 74.31 <sup>b</sup>  | 5.31 <sup>a</sup>  | 1074.88 <sup>a</sup> |
| 1                     | -                                  | 124.81 <sup>ab</sup> | 77.00 <sup>ab</sup> | 4.85 <sup>ab</sup> | 936.69 <sup>ab</sup> |
| 1                     | +                                  | 133.29 <sup>a</sup>  | 78.88 <sup>ab</sup> | 4.13 <sup>ab</sup> | 760.38 <sup>b</sup>  |
| <i>P</i> -value       |                                    | *                    | *                   | *                  | *                    |

<sup>a,b</sup>Means within a column with differing superscripts are significantly different at \**P* < 0.05. <sup>1</sup>High-Density Lipoprotein. <sup>2</sup>Alanine aminotransferase. <sup>3</sup>Lactate dehydrogenase. <sup>4</sup>Means represent 16 pens of chickens with 10 birds per pen (*n* = 16/group).

**Table S3.** Interaction effect between L-Threonine and Mycofix Plus (MP), on IBV<sup>1</sup> titer of broilers, Cobb 500<sup>2</sup>.

| Independent Variables          |          | IBV                 |
|--------------------------------|----------|---------------------|
| L-Threonine, % of Requirements | MP, g/kg | Log <sub>10</sub>   |
| 100                            | 0        | 3.829 <sup>ab</sup> |
| 100                            | 1        | 3.824 <sup>ab</sup> |
| 125                            | 0        | 3.823 <sup>b</sup>  |
| 125                            | 1        | 3.830 <sup>a</sup>  |
| <i>P</i> -value                |          | **                  |

<sup>a,b</sup>Means within a column with differing superscripts are significantly different at \*\**P* < 0.01. <sup>1</sup>Infectious Bronchitis Virus. <sup>2</sup>Means represent 16 pens of chickens with 10 birds per pen (*n* = 16/group).

**Table S4.** Interaction effect between Mycofix Plus (MP) and Aflatoxin B<sub>1</sub> on IBV<sup>1</sup> titer of broilers, Cobb 500<sup>2</sup>.

| Independent Variables |                                | IBV <sup>2</sup>    |
|-----------------------|--------------------------------|---------------------|
| MP, g/kg              | Aflatoxin B <sub>1</sub> , ppb | Log <sub>10</sub>   |
| 0                     | -                              | 3.831 <sup>a</sup>  |
| 0                     | +                              | 3.821 <sup>b</sup>  |
| 1                     | -                              | 3.826 <sup>ab</sup> |
| 1                     | +                              | 3.827 <sup>a</sup>  |
| <i>P</i> -value       |                                | **                  |

<sup>a,b</sup>Means within a column with differing superscripts are significantly different at \*\**P* < 0.01. <sup>1</sup>Infectious Bronchitis Virus. <sup>2</sup>Means represent 16 pens of chickens with 10 birds per pen (*n* = 16/group).

**Table S5.** Effect of L-Threonine and Mycofix Plus (MP) on meat quality of broilers exposed to Aflatoxin B<sub>1</sub>, Cobb 500.

| Treatments                                            | L-Threonine,<br>% of<br>Requirements | MP,<br>g/kg | Aflatoxin<br>B <sub>1</sub> , 500<br>ppb | pH                 | WHC <sup>1</sup><br>% | Cook<br>Loss<br>% | MDA <sup>2</sup> , Breast<br>mg MDA/kg of<br>meat | MDA,<br>Drumstick<br>mg<br>MDA/kg<br>of meat |
|-------------------------------------------------------|--------------------------------------|-------------|------------------------------------------|--------------------|-----------------------|-------------------|---------------------------------------------------|----------------------------------------------|
|                                                       |                                      |             |                                          |                    |                       |                   |                                                   |                                              |
| T <sub>1</sub>                                        | 100                                  | 0           | -                                        | 5.93               | 46.12                 | 23.28             | 1.39                                              | 2.46                                         |
| T <sub>2</sub>                                        | 100                                  | 0           | +                                        | 5.88               | 47.06                 | 25.42             | 1.41                                              | 2.28                                         |
| T <sub>3</sub>                                        | 100                                  | 1           | -                                        | 5.91               | 48.80                 | 24.75             | 1.32                                              | 2.23                                         |
| T <sub>4</sub>                                        | 100                                  | 1           | +                                        | 5.94               | 46.93                 | 21.52             | 1.54                                              | 2.38                                         |
| T <sub>5</sub>                                        | 125                                  | 0           | -                                        | 5.86               | 47.66                 | 22.72             | 1.43                                              | 2.36                                         |
| T <sub>6</sub>                                        | 125                                  | 0           | +                                        | 5.92               | 47.47                 | 23.66             | 1.55                                              | 2.46                                         |
| T <sub>7</sub>                                        | 125                                  | 1           | -                                        | 5.89               | 50.91                 | 23.09             | 1.68                                              | 2.34                                         |
| T <sub>8</sub>                                        | 125                                  | 1           | +                                        | 5.90               | 50.85                 | 23.48             | 1.53                                              | 2.29                                         |
| Pooled SEM                                            |                                      |             |                                          | 0.04               | 2.15                  | 1.37              | 0.12                                              | 0.16                                         |
| Main Effects                                          |                                      | Levels      |                                          | Means <sup>3</sup> |                       |                   |                                                   |                                              |
| L-Threonine                                           |                                      | 100         |                                          | 5.91               | 47.23                 | 23.74             | 1.41                                              | 2.34                                         |
|                                                       |                                      | 125         |                                          | 5.89               | 49.22                 | 23.24             | 1.55                                              | 2.36                                         |
| Mycofix Plus                                          |                                      | 0           |                                          | 5.90               | 47.08                 | 23.77             | 1.44                                              | 2.39                                         |
|                                                       |                                      | 1           |                                          | 5.91               | 49.37                 | 23.21             | 1.52                                              | 2.31                                         |
| Aflatoxin B <sub>1</sub>                              |                                      | -           |                                          | 5.90               | 48.37                 | 23.46             | 1.45                                              | 2.35                                         |
|                                                       |                                      | +           |                                          | 5.91               | 48.08                 | 23.52             | 1.51                                              | 2.35                                         |
| Main Effects and Interaction Effects                  |                                      |             |                                          | <i>P</i> -values   |                       |                   |                                                   |                                              |
| L-Threonine                                           |                                      |             |                                          | NS                 | NS                    | NS                | NS                                                | NS                                           |
| Mycofix Plus                                          |                                      |             |                                          | NS                 | NS                    | NS                | NS                                                | NS                                           |
| Aflatoxin B <sub>1</sub>                              |                                      |             |                                          | NS                 | NS                    | NS                | NS                                                | NS                                           |
| L-Threonine × Mycofix Plus                            |                                      |             |                                          | NS                 | NS                    | NS                | NS                                                | NS                                           |
| L-Threonine × Aflatoxin B <sub>1</sub>                |                                      |             |                                          | NS                 | NS                    | NS                | NS                                                | NS                                           |
| Mycofix Plus × Aflatoxin B <sub>1</sub>               |                                      |             |                                          | NS                 | NS                    | NS                | NS                                                | NS                                           |
| L-Threonine × Mycofix Plus × Aflatoxin B <sub>1</sub> |                                      |             |                                          | NS                 | NS                    | NS                | NS                                                | NS                                           |

<sup>1</sup>Water Holding Capacity. <sup>2</sup>Malondialdehyde. <sup>3</sup>Means represent 32 pens of chickens with 10 birds per pen (*n* = 32/group). NS, *P* ≥ 0.05.

**Table S6.** Effect of L-Threonine and Mycofix Plus (MP) on cecal microflora of broilers exposed to Aflatoxin B<sub>1</sub>, Cobb 500.

| Treatments                                            | L-Threonine, % of Requirements | MP, g/kg | Aflatoxin B <sub>1</sub> , 500 ppb | TAC <sup>1</sup>   | <i>E. coli</i> <sup>2</sup> | <i>Lactobacilli</i> |
|-------------------------------------------------------|--------------------------------|----------|------------------------------------|--------------------|-----------------------------|---------------------|
|                                                       |                                |          |                                    | CFU <sup>3</sup>   | CFU                         | CFU                 |
| T <sub>1</sub>                                        | 100                            | 0        | -                                  | 8.30               | 8.13                        | 8.02                |
| T <sub>2</sub>                                        | 100                            | 0        | +                                  | 8.36               | 8.20                        | 8.24                |
| T <sub>3</sub>                                        | 100                            | 1        | -                                  | 8.37               | 7.92                        | 8.24                |
| T <sub>4</sub>                                        | 100                            | 1        | +                                  | 8.28               | 8.02                        | 8.05                |
| T <sub>5</sub>                                        | 125                            | 0        | -                                  | 8.36               | 7.96                        | 8.23                |
| T <sub>6</sub>                                        | 125                            | 0        | +                                  | 8.34               | 7.75                        | 8.17                |
| T <sub>7</sub>                                        | 125                            | 1        | -                                  | 8.22               | 8.00                        | 8.26                |
| T <sub>8</sub>                                        | 125                            | 1        | +                                  | 8.39               | 8.05                        | 8.24                |
| Pooled SEM                                            |                                |          |                                    | 0.09               | 0.16                        | 0.11                |
| Main Effects                                          |                                |          | Levels                             | Means <sup>4</sup> |                             |                     |
| L-Threonine                                           |                                |          | 100                                | 8.33               | 8.07                        | 8.14                |
|                                                       |                                |          | 125                                | 8.32               | 7.94                        | 8.22                |
| Mycofix Plus                                          |                                |          | 0                                  | 8.34               | 8.01                        | 8.16                |
|                                                       |                                |          | 1                                  | 8.31               | 8.00                        | 8.20                |
| Aflatoxin B <sub>1</sub>                              |                                |          | -                                  | 8.31               | 8.00                        | 8.19                |
|                                                       |                                |          | +                                  | 8.34               | 8.01                        | 8.18                |
| Main Effects and Interaction Effects                  |                                |          |                                    | <i>P</i> -values   |                             |                     |
| L-Threonine                                           |                                |          |                                    | NS                 | NS                          | NS                  |
| Mycofix Plus                                          |                                |          |                                    | NS                 | NS                          | NS                  |
| Aflatoxin B <sub>1</sub>                              |                                |          |                                    | NS                 | NS                          | NS                  |
| L-Threonine × Mycofix Plus                            |                                |          |                                    | NS                 | NS                          | NS                  |
| L-Threonine × Aflatoxin B <sub>1</sub>                |                                |          |                                    | NS                 | NS                          | NS                  |
| Mycofix Plus × Aflatoxin B <sub>1</sub>               |                                |          |                                    | NS                 | NS                          | NS                  |
| L-Threonine × Mycofix Plus × Aflatoxin B <sub>1</sub> |                                |          |                                    | NS                 | NS                          | NS                  |

<sup>1</sup>Total Aerobic Bacteria Counts. <sup>2</sup>*Escherichia Coli*. <sup>3</sup>Colony Forming Unit; Values are log<sub>10</sub> of colony-forming units of cecal content (CFU) g<sup>-1</sup>. <sup>4</sup>Means represent 32 pens of chickens with 10 birds per pen (*n* = 32/group). NS, *P* ≥ 0.05.
